# Supplementary material
Source: ML conference proceedings conference paper supplement (https://openaccess.thecvf.com/content/CVPR2022/html/Xu_FineDiving_A_Fine-Grained_CVPR_2022_paper.html)
Supplement: Supplementary file 1 [file Xu_FineDiving_A_Fine-Grained_CVPR_2022_supplemental.pdf]

# FineDiving: A Fine-grained Dataset for Procedure-aware Action Quality Assessment Supplementary Materials

## A. More Experiment Settings

### A.1. The Criterion of Selecting Exemplars

For our approach TSA (w/ DN), we selected exemplars from the training set based on the action types. In training, for each instance, we randomly selected an instance as an exemplar from the rest of the training instances with the same action type. In inference, we adopted the multi-exemplar voting strategy, i.e., randomly selecting 10 instances as 10 exemplars from the training instances with the same action type. For our approach TSA (w/o DN), we randomly selected exemplars from the training set in both training and inference.

### A.2. The Number of Step Transitions

In FineDiving, the 60% action types (e.g., 307C and 614B) consist of 3 sub-action types, corresponding to 3 steps; 30% action types (e.g., 5251B and 6241B) consist of 4 sub-action types, corresponding to 4 steps; 10% action types (e.g., 5152B and 5156B) consist of 4 sub-action types, corresponding to 5 steps. We provided full annotations of 5 possible steps to support future research on utilizing fine-grained annotations for AQA. In experiments, our approach keeps  $L$  constant and equals 2, indicating segmenting a dive action into 3 steps, i.e., 2 step transitions. The reasons are as follows. A dive action consists of *take-off*, *flight*, and *entry*. If *flight* is accomplished by one sub-action type, a dive action is divided into 3 steps, e.g., 307C containing 3 steps: Reverse, 3.5 Soms.Tuck, and Entry. If *flight* is accomplished by two sub-action types successively, a dive action is divided into 4 steps, e.g., 6241B containing 4 steps: Arm.Back, 0.5 Twist, 2 Soms.Pike, and Entry. If *flight* is accomplished by two sub-action types and one sub-action type is interspersed in another, a dive action is divided into 5 steps, e.g., 5152B containing 5 steps: Forward, 2.5 Soms.Pike, 1 Twist, 2.5 Soms.Pike, and Entry, where “1 Twist” is interspersed in “2.5 Soms.Pike”. We see that two cases of *flight* accomplished by two sub-action types can be seen as two special cases of *flight* accomplished by one sub-action type. Therefore,  $L=2$  makes sense.

## B. More Ablation Study

We summarize hyper-parameters for training as follows: the number of frames in each step is fixed into 5 before being fed into Multi-head Cross-Attention (MCA); all con-

figurations are based on transformer decoder with 3 layers and 8 heads.

Table 1. Effects of the number of frames in each step in the procedure-aware cross-attention model.

| $L_{\text{step}}$ | AIoU@        |              | $\rho$        | R- $\ell_2(\times 100)$ |
|-------------------|--------------|--------------|---------------|-------------------------|
|                   | 0.5          | 0.75         |               |                         |
| 3                 | 76.49        | 24.17        | 0.9081        | 0.4003                  |
| <b>5</b>          | <b>82.51</b> | <b>34.31</b> | <b>0.9203</b> | <b>0.3420</b>           |
| 8                 | 80.65        | 33.37        | 0.9198        | 0.3501                  |
| 10                | 77.97        | 30.44        | 0.9174        | 0.3588                  |
| 15                | 77.96        | 30.32        | 0.9149        | 0.3675                  |

To investigate the effects of the number of frames in each step (denoted as  $L_{\text{step}}$ ) on the performance of action quality assessment, we conduct several experiments on the FineDiving dataset. Table 1 summarizes the performance with different  $L_{\text{step}}$  including 3, 5, 8, 10 and 15. We observe that when  $L_{\text{step}}$  increases from 3 to 5, the action quality assessment performance achieves 1.22% and 0.0583 improvements respectively on Spearman’s rank correlation and Relative  $\ell_2$ -distance. When  $L_{\text{step}}$  is bigger than 8, the performance tends to be flat with a slight decrease. Specifically, compared with the performance of  $L_{\text{step}}=5$ , that of  $L_{\text{step}}=8$  degrades 0.05% and 0.0081 on Spearman’s rank correlation and Relative  $\ell_2$ -distance, respectively. The experimental results illustrate that the number of frames in each step is not proportional to the action quality assessment performance, since each step containing fewer frames cannot make full use of intra-step information while each step containing too many frames may introduce some noisy information.

Table 2. Effects of the number of transformer decoder layers.

| $R$      | AIoU@        |              | $\rho$        | R- $\ell_2(\times 100)$ |
|----------|--------------|--------------|---------------|-------------------------|
|          | 0.5          | 0.75         |               |                         |
| 1        | 81.71        | 33.24        | 0.9168        | 0.3612                  |
| <b>3</b> | <b>82.51</b> | <b>34.31</b> | <b>0.9203</b> | <b>0.3420</b>           |
| 5        | 79.83        | 31.84        | 0.9202        | 0.3483                  |
| 10       | 79.57        | 31.78        | 0.9171        | 0.3534                  |

To explore the effect of the number of transformer decoder layers (denoted as  $R$ ) on the performance of action quality assessment, we conduct several experiments on the FineDiving dataset. Table 2 summarizes the performance with different  $R$ , namely 1, 3, 5, and 10. It can be seen that when  $R$  equals 3, the action quality assessment performance reaches the peaks (namely 0.9203 and 0.3420) on

Spearman’s rank correlation and Relative  $\ell_2$ -distance, respectively. The performance tends to be flat with a slight decrease when  $R > 5$ , since too many transformer decoder layers may lead to overfitting for each step containing 5 frames ( $L_{\text{step}}=5$ ).

## C. Code

We provide the FineDiving dataset and code of our approach<sup>1</sup>, including the training and inference phases.

## D. The FineDiving Dataset Details

We will release the FineDiving dataset to promote future research on action quality assessment.

### D.1. Descriptions of Action and Sub-action Types

Table 3 shows the detailed descriptions of action and sub-action types in FineDiving mentioned in the lexicon in subsection 3.1. Dataset Construction. We see that a combination of the sub-action types from three phases (namely take-off, flight, and entry) generates an action type. Specifically, the take-off phase is annotated by one of six sub-action types which are “Forward, Back, Reverse, Inward, Armstand Forward, Armstand Back, and Armstand Reverse”. The entry phase is annotated by the sub-action type “Entry”. The flight phase is labeled by one or two sub-action types describing the somersault process, where the number of sub-action types depends on the somersault process whether containing the twist or not.

As shown in Table 3, if the somersault process contains the twist, the flight phase is annotated by two sub-action types, where one sub-action type annotates the number of twist turns in the somersault process and another is annotated the number of somersault turns in the somersault process. The former sub-action type is a part of the latter sub-action type and does not be performed independently without the latter sub-action type. For different action types, the former sub-action type (twist) may occur at different locations in the somersault process. When the twist is performed at the beginning of the somersault process, we first annotate the number of twist turns and then annotate the number of somersault turns, such as the action types 5231D and 6245D in Table 3. When the twist is performed at the middle of the somersault process, we first annotate the number of somersault turns, then annotate the number of twist turns, and finally annotate the number of somersault turns, such as 5132D and 5172B in Table 3. Note that, the first and the last annotated the same somersault process but are separated by the twist. If the somersault process does not contain the twist, the flight phase is annotated by one sub-action type, that is, the number of somersault turns, such as 205B and 626C in Table 3.

<sup>1</sup><https://github.com/xujinglin/FineDiving>

## D.2. Annotation Tool

In the fine-grained annotation stage, the durations of sub-action types are different for different action instances, which may cost a huge workload to label the FineDiving dataset with a conventional annotation tool. To improve the annotation efficiency, we utilize a publically available annotation toolbox [1] (mentioned in Annotation in subsection 3.1. Dataset Construction) to generate the frame-wise labels for various sub-action types, which can ensure high efficiency, accuracy, and consistency of our annotation results. Figure 1 shows an example interface of the annotation tool, which annotates the frames extracted from an action instance.

## References

- [1] Yansong Tang, Dajun Ding, Yongming Rao, Yu Zheng, Danyang Zhang, Lili Zhao, Jiwen Lu, and Jie Zhou. Coin: A large-scale dataset for comprehensive instructional video analysis. In *CVPR*, pages 1207–1216, 2019. 2

Table 3. The detailed descriptions of action and sub-action types.

| Action Type | Sub-action Type |                  |       | Action Type | Sub-action Type |               |               |               |
|-------------|-----------------|------------------|-------|-------------|-----------------|---------------|---------------|---------------|
|             | Take-off        | Flight           | Entry |             | Take-off        | Flight        | Entry         |               |
| 101B        | Forward         | 0.5 Som.Pike     | Entry | 612B        | Arm.Fwd         | 1 Som.Pike    | Entry         |               |
| 103B        | Forward         | 1.5 Soms.Pike    |       | 614B        | Arm.Fwd         | 2 Soms.Pike   |               |               |
| 105B        | Forward         | 2.5 Soms.Pike    |       | 626B        | Arm.Back        | 3 Soms.Pike   |               |               |
| 107B        | Forward         | 3.5 Soms.Pike    |       | 626C        | Arm.Back        | 3 Soms.Tuck   |               |               |
| 109B        | Forward         | 4.5 Soms.Pike    |       | 636C        | Arm.Reverse     | 3 Soms.Tuck   |               |               |
| 107C        | Forward         | 3.5 Soms.Tuck    |       | 5231D       | Back            | 0.5 Twist     |               | 1.5 Soms.Pike |
| 109C        | Forward         | 4.5 Soms.Tuck    |       | 5233D       | Back            | 1.5 Twists    |               | 1.5 Soms.Pike |
| 201A        | Back            | 0.5 Som.Straight |       | 5235D       | Back            | 2.5 Twists    |               | 1.5 Soms.Pike |
| 201B        | Back            | 0.5 Som.Pike     |       | 5237D       | Back            | 3.5 Twists    |               | 1.5 Soms.Pike |
| 201C        | Back            | 0.5 Som.Tuck     |       | 5251B       | Back            | 0.5 Twist     |               | 2.5 Soms.Pike |
| 205B        | Back            | 2.5 Soms.Pike    |       | 5253B       | Back            | 1.5 Twists    | 2.5 Soms.Pike |               |
| 207B        | Back            | 3.5 Soms.Pike    |       | 5255B       | Back            | 2.5 Twists    | 2.5 Soms.Pike |               |
| 205C        | Back            | 2.5 Soms.Tuck    |       | 5331D       | Reverse         | 0.5 Twist     | 1.5 Soms.Pike |               |
| 207C        | Back            | 3.5 Soms.Tuck    |       | 5335D       | Reverse         | 2.5 Twists    | 1.5 Soms.Pike |               |
| 301B        | Reverse         | 0.5 Som.Pike     |       | 5337D       | Reverse         | 3.5 Twists    | 1.5 Soms.Pike |               |
| 305B        | Reverse         | 2.5 Soms.Pike    |       | 5353B       | Reverse         | 1.5 Twists    | 2.5 Soms.Pike |               |
| 303C        | Reverse         | 1.5 Soms.Tuck    |       | 5355B       | Reverse         | 2.5 Twists    | 2.5 Soms.Pike |               |
| 305C        | Reverse         | 2.5 Soms.Tuck    |       | 6142D       | Arm.Fwd         | 1 Twist       | 2 Soms.Pike   |               |
| 307C        | Reverse         | 3.5 Soms.Tuck    |       | 6241B       | Arm.Back        | 0.5 Twist     | 2 Soms.Pike   |               |
| 401B        | Inward          | 0.5 Som.Pike     |       | 6243D       | Arm.Back        | 1.5 Twists    | 2 Soms.Pike   |               |
| 403B        | Inward          | 1.5 Soms.Pike    |       | 6245D       | Arm.Back        | 2.5 Twists    | 2 Soms.Pike   |               |
| 405B        | Inward          | 2.5 Soms.Pike    |       | 5132D       | Forward         | 1.5 Soms.Pike | 1 Twist       | 1.5 Soms.Pike |
| 407B        | Inward          | 3.5 Soms.Pike    |       | 5152B       | Forward         | 2.5 Soms.Pike | 1 Twist       | 2.5 Soms.Pike |
| 405C        | Inward          | 2.5 Soms.Tuck    |       | 5154B       | Forward         | 2.5 Soms.Pike | 2 Twists      | 2.5 Soms.Pike |
| 407C        | Inward          | 3.5 Soms.Tuck    |       | 5156B       | Forward         | 2.5 Soms.Pike | 3 Twists      | 2.5 Soms.Pike |
| 409C        | Inward          | 4.5 Soms.Tuck    |       | 5172B       | Forward         | 3.5 Soms.Pike | 1 Twist       | 3.5 Soms.Pike |

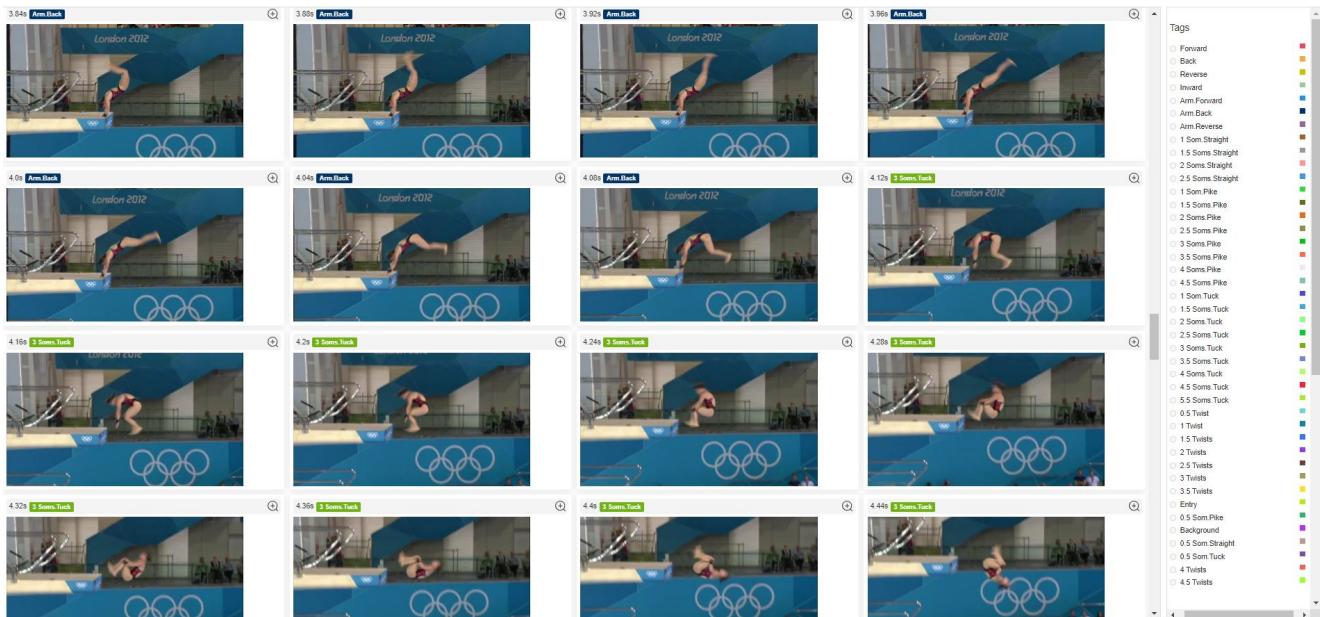

Figure 1. The interface for sub-action type annotation tool. The left part represents the video frames to be annotated by the pre-defined sub-action types. The right part shows the pre-defined sub-action types using different colors.
